# Supplementary material for: A near-infrared xanthene fluorescence probe for monitoring peroxynitrite in living cells and mouse inflammation model
Source: Royal Society of Chemistry journal article supplement (doi:10.1039/c8an01107a), 2018-01-01
Supplement: c8an01107a1.pdf [file c8an01107a1.pdf]

## Electronic Supplementary Information

### A Near-Infrared Xanthene Fluorescence Probe for Monitoring Peroxynitrite in Living Cells and Mouse Inflammation Model

Yongquan Wu\*, Aiping Shi, Yuanyan Li, Hong Zeng, Xiaoyong Chen, Jie Wu, Xiaolin Fan\*

School of Chemistry and Chemical Engineering & Key Laboratory of Organo-Pharmaceutical

Chemistry of Jiangxi Province, Gannan Normal University, Ganzhou 341000, P. R. China

E-mail: wyq@gnnu.edu.cn; fanxl2013@gnnu.cn; Fax: +86 797 8393 536; Tel: +86 797 8393 536

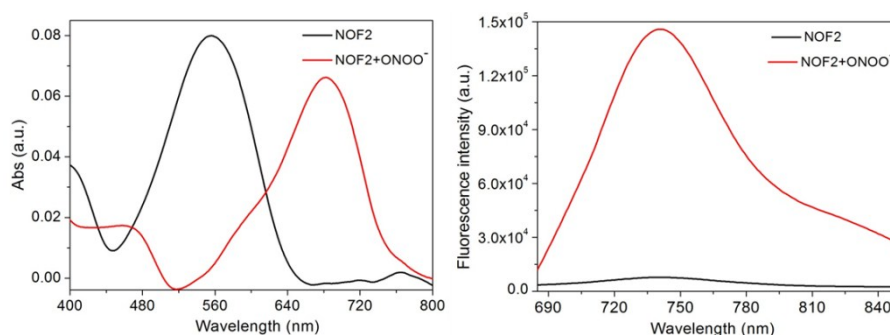

**Figure S1.** Absorption spectra and Fluorescence spectra of 10  $\mu\text{M}$  NOF2 in absence and presence of 80  $\mu\text{M}$  ONOO<sup>-</sup> in PBS: DMSO=1:1 (v/v),  $\lambda_{\text{ex}}$  = 670 nm.

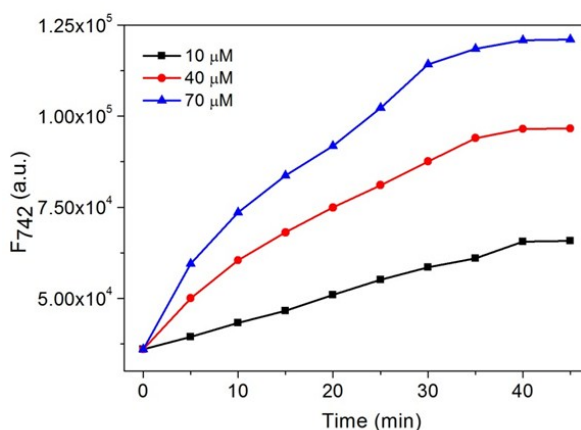

**Figure S2.** Time course of fluorescence intensity ( $\lambda_{\text{em}}$  = 742 nm) of NOF2 (10  $\mu\text{M}$ ) in DMSO/PBS (v/v, 1/1) in the presence of 10  $\mu\text{M}$ , 40  $\mu\text{M}$ , and 70  $\mu\text{M}$  ONOO<sup>-</sup> during a period of 45 minutes,  $\lambda_{\text{ex}}$  = 670 nm.

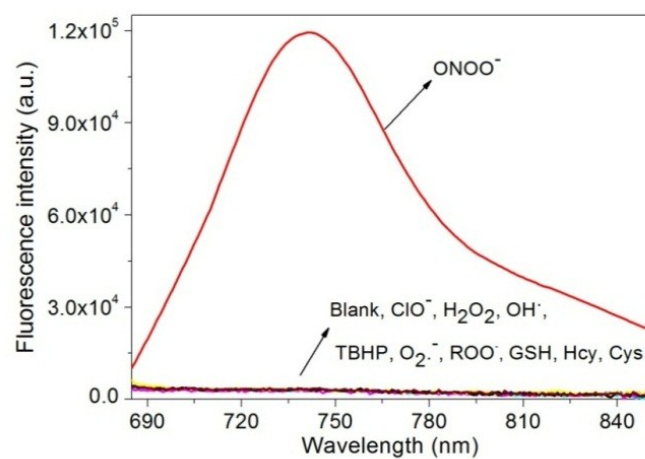

**Figure S3.** Fluorescence spectra of 10  $\mu\text{M}$  NOF2 in presence of various species ( $\text{ONOO}^-$ ,  $\text{ClO}^-$ ,  $\text{H}_2\text{O}_2$ ,  $\cdot\text{OH}$ , TBHP,  $\text{O}_2\cdot^-$ ,  $\text{ROO}^-$ , GSH, Hcy, Cys),  $\lambda_{\text{ex}} = 670 \text{ nm}$ .

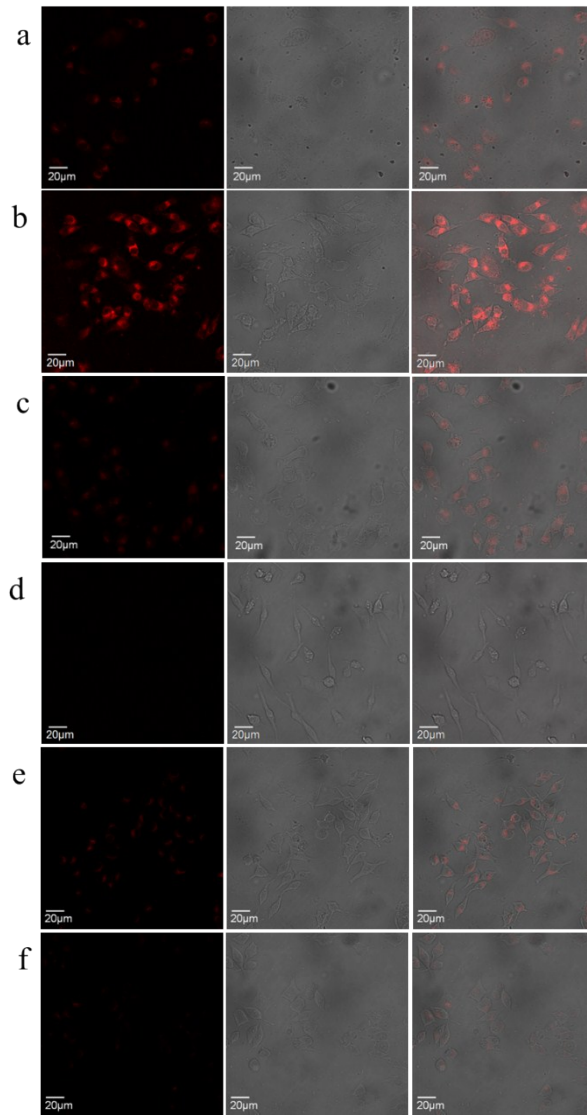

**Figure S4.** Fluorescence confocal microscopic images of RAW264.7 cells exposed to oxidative stress. Macrophage cells were treated with various inducers and then loaded with 5  $\mu$ M NOF2 for 60 min (a) control. (b) LPS (1  $\mu$ g/mL) and IFN- $\gamma$  (50 ng/mL) for 4 h then PMA (10 nM) for 30 min. (c) AG (1 mM), LPS (1  $\mu$ g/mL), and IFN- $\gamma$  (50 ng/mL) for 4 h then PMA (10 nM) for 30 min. (d) TEMPO (100  $\mu$ M), LPS (1  $\mu$ g/mL), and IFN- $\gamma$  (50 ng/mL) for 4 h then PMA (10 nM) for 30 min. (e) Cells treated with 100  $\mu$ M NaClO for 30 min. (f) cells treated with 100  $\mu$ M H<sub>2</sub>O<sub>2</sub> for 10 min.

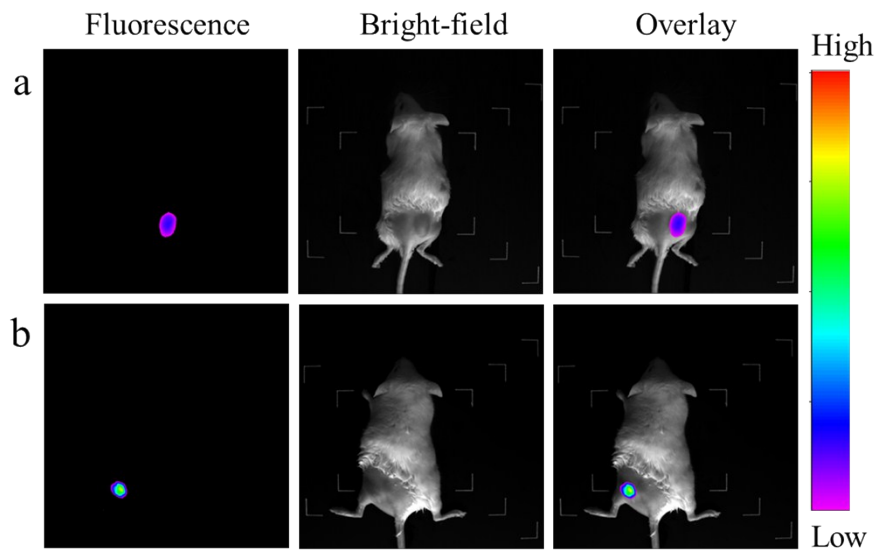

**Figure S5.** (a) The mouse was given an i.p. injection of LPS for 4 h then injected with PMA and TEMPO, then followed by injection of NOF2 (100  $\mu$ L, 50  $\mu$ M in saline). (b) The mouse was i.p. injected with LPS for 4 h, injected with PMA, followed by injection of NOF2.

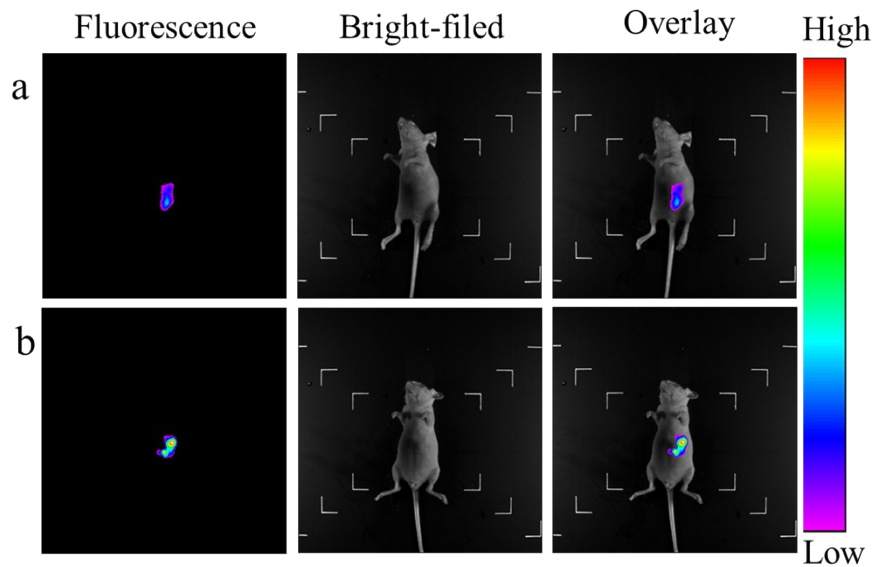

**Figure S6.** (a) The mouse was given an i.p. injection of LPS for 4 h then injected with PMA and AG (1 mM, 100  $\mu$ L), then followed by injection of NOF2. (b) The mouse was i.p. injected with LPS for 4 h, injected with PMA, followed by injection of NOF2.
